# Supplementary material
Source: MDPI journal article supplement (https://www.mdpi.com/2624-6511/6/1/22)
Supplement: s1 [file s1]

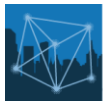

## Article

# The evaluation in the urban projects planning: a logical-deductive model for the definition of "warning areas" in the Esquilino district in the city of Rome (Italy)

Pierluigi Morano <sup>1</sup>, Francesco Tajani <sup>2</sup>, Felicia Di Liddo <sup>1\*</sup>, Ivana La Spina <sup>2</sup>

<sup>1</sup> Department of Civil, Environmental, Land, Building Engineering and Chemistry (DICATECh), Polytechnic University of Bari, Via Orabona 4, 70125 Bari, Italy;

<sup>2</sup> Department of Architecture and Design, Sapienza University of Rome, Italy

\* Correspondence: felicia.diliddo@poliba.it

| Variable                                    | Mean    | Standard Deviation | Levels/Intervals        | Frequence [%] |
|---------------------------------------------|---------|--------------------|-------------------------|---------------|
| Total selling price [€]                     | 445,159 | 260,681            | <250,000 €              | 55            |
|                                             |         |                    | 251,000 € - 300,000 €   | 59            |
|                                             |         |                    | 301,000 € - 400,000 €   | 134           |
|                                             |         |                    | 400,000 € - 500,000 €   | 53            |
|                                             |         |                    | 501,000 € - 600,000 €   | 40            |
|                                             |         |                    | 601,000 € - 700,000 €   | 20            |
|                                             |         |                    | 701,000 € - 900,000 €   | 12            |
|                                             |         |                    | 901,000 € - 1,100,000 € | 10            |
|                                             |         |                    | >1,100,000 €            | 17            |
| Total floor area [m²]                       | 109     | 58                 | < 40m²                  | 18            |
|                                             |         |                    | 41m²-80m²               | 118           |
|                                             |         |                    | 81m²-100m²              | 83            |
|                                             |         |                    | 101m²-120m²             | 69            |
|                                             |         |                    | 121m²-150m²             | 48            |
|                                             |         |                    | 151m²-200m²             | 38            |
|                                             |         |                    | >200m²                  | 26            |
| Presence of lift<br>[1-presence, 0-absence] | 0.85    | 1.62               | 0                       | 59            |
|                                             |         |                    | 1                       | 341           |
| Floor [n.]                                  | 2.69    | 0.35               | 0                       | 23            |
|                                             |         |                    | 1                       | 84            |
|                                             |         |                    | 2                       | 101           |
|                                             |         |                    | 3                       | 63            |
|                                             |         |                    | 4                       | 70            |
|                                             |         |                    | 5                       | 37            |
|                                             |         |                    | 6                       | 19            |
|                                             |         |                    | 7                       | 3             |
|                                             |         |                    | to be restructured      | 139           |

|                                                   |      |      |             |     |
|---------------------------------------------------|------|------|-------------|-----|
|                                                   |      |      |             |     |
| Quality of the residential unit maintenance state |      |      | good        | 151 |
|                                                   |      |      | excellent   | 110 |
| Distance from Piazza Dante [km]                   | 0.92 | 0.60 | 0-500m      | 115 |
|                                                   |      |      | 501m-1000m  | 155 |
|                                                   |      |      | 1001m-1500m | 45  |
|                                                   |      |      | 1501m-2000m | 57  |
|                                                   |      |      | 2001m-2400m | 28  |
| Distance from Piazza dell'Indipendenza [km]       | 1.26 | 0.62 | 0-500m      | 70  |
|                                                   |      |      | 501m-1000m  | 75  |
|                                                   |      |      | 1001m-1500m | 100 |
|                                                   |      |      | 1501m-2000m | 109 |
|                                                   |      |      | 2001m-2600m | 46  |
| Distance from Piazza Vittorio Emanuele II [km]    | 0.74 | 0.49 | 0-500m      | 199 |
|                                                   |      |      | 501m-1000m  | 90  |
|                                                   |      |      | 1001m-1500m | 72  |
|                                                   |      |      | 1501m-2000m | 38  |
|                                                   |      |      | 2001m-2600m | 1   |
| Distance from Piazza dei Cinquecento [km]         | 1.06 | 0.48 | 0-500m      | 38  |
|                                                   |      |      | 501m-1000m  | 190 |
|                                                   |      |      | 1001m-1500m | 117 |
|                                                   |      |      | 1501m-2000m | 42  |
|                                                   |      |      | 2001m-2400m | 13  |
| Distance from Piazza Esedra [km]                  | 1.20 | 0.53 | 0-500m      | 34  |
|                                                   |      |      | 501m-1000m  | 163 |
|                                                   |      |      | 1001m-1500m | 93  |
|                                                   |      |      | 1501m-2000m | 79  |
|                                                   |      |      | 2001m-2600m | 31  |
| Distance from Casa dell'Architettura [km]         | 0.75 | 0.41 | 0-500m      | 133 |
|                                                   |      |      | 501m-1000m  | 178 |
|                                                   |      |      | 1001m-1500m | 78  |
|                                                   |      |      | 1501m-1800m | 11  |
| Distance from the Porta Maggiore Monument [km]    | 1.28 | 0.53 | 0-500m      | 26  |
|                                                   |      |      | 501m-1000m  | 113 |
|                                                   |      |      | 1001m-1500m | 153 |
|                                                   |      |      | 1501m-2000m | 54  |
|                                                   |      |      | 2001m-2500m | 54  |
| Distance from the Termini railway Station [km]    | 0.99 | 0.46 | 0-500m      | 63  |
|                                                   |      |      | 501m-1000m  | 174 |
|                                                   |      |      | 1001m-1500m | 112 |
|                                                   |      |      | 1501m-2000m | 40  |
|                                                   |      |      | 2001m-2300m | 11  |

| Distance from the nearest public facility                                                                           |                                 |                                |                                |                                |
|---------------------------------------------------------------------------------------------------------------------|---------------------------------|--------------------------------|--------------------------------|--------------------------------|
| Public facility                                                                                                     | Distance from the facility [km] | Distance from the facility [m] | Distance from the facility [m] | Distance from the facility [m] |
|                                                                                                                     |                                 |                                |                                |                                |
| Distance from the New Esquilino Market [km]                                                                         | 0.76                            | 0.46                           | 0-500m                         | 169                            |
|                                                                                                                     |                                 |                                | 501m-1000m                     | 115                            |
|                                                                                                                     |                                 |                                | 1001m-1500m                    | 80                             |
|                                                                                                                     |                                 |                                | 1501m-2000m                    | 36                             |
| Distance from the Polyclinic Umberto I [km]                                                                         | 1.90                            | 0.43                           | 0-500m                         | 0                              |
|                                                                                                                     |                                 |                                | 501m-1000m                     | 16                             |
|                                                                                                                     |                                 |                                | 1001m-1500m                    | 56                             |
|                                                                                                                     |                                 |                                | 1501m-2000m                    | 178                            |
|                                                                                                                     |                                 |                                | 2001m-2400m                    | 142                            |
|                                                                                                                     |                                 |                                | 2401m-2800m                    | 8                              |
| Distance from the San Giovanni Addolorata Hospital [km]                                                             | 1.73                            | 0.61                           | 0-500m                         | 0                              |
|                                                                                                                     |                                 |                                | 501m-1000m                     | 46                             |
|                                                                                                                     |                                 |                                | 1001m-1500m                    | 136                            |
|                                                                                                                     |                                 |                                | 1501m-2000m                    | 124                            |
|                                                                                                                     |                                 |                                | 2001m-2400m                    | 24                             |
|                                                                                                                     |                                 |                                | 2401m-3200m                    | 70                             |
| Distance from the Sapienza University of Rome Campus [km]                                                           | 1.81                            | 0.33                           | 0-500m                         | 0                              |
|                                                                                                                     |                                 |                                | 501m-1000m                     | 15                             |
|                                                                                                                     |                                 |                                | 1001m-1500m                    | 56                             |
|                                                                                                                     |                                 |                                | 1501m-2000m                    | 217                            |
|                                                                                                                     |                                 |                                | 2001m-2500m                    | 112                            |
| Distance from the Science of Education Department – University of Rome 3 (entrance on Via Principe Amedeo) [km]     | 0.73                            | 0.45                           | 0-500m                         | 178                            |
|                                                                                                                     |                                 |                                | 501m-1000m                     | 111                            |
|                                                                                                                     |                                 |                                | 1001m-1500m                    | 84                             |
|                                                                                                                     |                                 |                                | 1501m-1900m                    | 27                             |
| Distance from the Science of Education Department – University of Rome 3 (entrance on Via del Castro Pretorio) [km] | 1.16                            | 0.44                           | 0-500m                         | 30                             |
|                                                                                                                     |                                 |                                | 501m-1000m                     | 138                            |
|                                                                                                                     |                                 |                                | 1001m-1500m                    | 141                            |
|                                                                                                                     |                                 |                                | 1501m-2000m                    | 82                             |
|                                                                                                                     |                                 |                                | 2001m-2200m                    | 9                              |
| Distance from the Department of Computer, Automatic, and Management Engineering - Sapienza University of Rome [km]  | 1.02                            | 0.60                           | 0-500m                         | 87                             |
|                                                                                                                     |                                 |                                | 501m-1000m                     | 176                            |
|                                                                                                                     |                                 |                                | 1001m-1500m                    | 46                             |
|                                                                                                                     |                                 |                                | 1501m-2000m                    | 50                             |
|                                                                                                                     |                                 |                                | 2001m-2500m                    | 41                             |
| Distance from the Colosseum [km]                                                                                    | 1.68                            | 0.37                           | 0-500m                         | 0                              |
|                                                                                                                     |                                 |                                | 501m-1000m                     | 2                              |
|                                                                                                                     |                                 |                                | 1001m-1500m                    | 153                            |
|                                                                                                                     |                                 |                                | 1501m-2000m                    | 158                            |
|                                                                                                                     |                                 |                                | 2001m-2600m                    | 87                             |
| Distance from the Museum of the                                                                                     | 1.24                            | 0.66                           | 0-500m                         | 30                             |

| Distance from the Colosseum [km]               |      |      |  | Distance from the Colosseum [m] |     |
|------------------------------------------------|------|------|--|---------------------------------|-----|
| Liberation [km]                                |      |      |  | 501m-1000m                      | 177 |
|                                                |      |      |  | 1001m-1500m                     | 84  |
|                                                |      |      |  | 1501m-2000m                     | 33  |
|                                                |      |      |  | 2001m-2400m                     | 59  |
|                                                |      |      |  | 2401m-2700m                     | 17  |
|                                                |      |      |  | 0-500m                          | 4   |
| Distance from the Biblioteca Nazionale [km]    | 1.68 | 0.53 |  | 501m-1000m                      | 65  |
|                                                |      |      |  | 1001m-1500m                     | 66  |
|                                                |      |      |  | 1501m-2000m                     | 158 |
|                                                |      |      |  | 2001m-2400m                     | 96  |
|                                                |      |      |  | 2401m-2700m                     | 11  |
|                                                |      |      |  | 0-500m                          | 45  |
| Distance from the Terme di Diocleziano [km]    | 1.15 | 0.54 |  | 501m-1000m                      | 154 |
|                                                |      |      |  | 1001m-1500m                     | 89  |
|                                                |      |      |  | 1501m-2000m                     | 84  |
|                                                |      |      |  | 2001m-2600m                     | 28  |
|                                                |      |      |  | 0-500m                          | 2   |
|                                                |      |      |  | 501m-1000m                      | 127 |
| Distance from the Park of the Oppian Hill [km] | 1.28 | 0.42 |  | 1001m-1500m                     | 159 |
|                                                |      |      |  | 1501m-2000m                     | 97  |
|                                                |      |      |  | 2001m-2300m                     | 15  |
|                                                |      |      |  | 0-500m                          | 31  |
|                                                |      |      |  | 501m-1000m                      | 180 |
|                                                |      |      |  | 1001m-1500m                     | 136 |
| Distance from the Teatro dell'Opera [km]       | 1.10 | 0.43 |  | 1501m-2000m                     | 39  |
|                                                |      |      |  | 2001m-2500m                     | 14  |
|                                                |      |      |  | 0-500m                          | 86  |
|                                                |      |      |  | 501m-1000m                      | 186 |
|                                                |      |      |  | 1001m-1500m                     | 70  |
|                                                |      |      |  | 1501m-2100m                     | 57  |
| Distance from the Teatro Brancaccio [km]       | 0.90 | 0.47 |  | 0-500m                          | 129 |
|                                                |      |      |  | 501m-1000m                      | 156 |
|                                                |      |      |  | 1001m-1500m                     | 82  |
|                                                |      |      |  | 1501m-1900m                     | 33  |
|                                                |      |      |  | 0-500m                          | 5   |
|                                                |      |      |  | 501m-1000m                      | 103 |
| Distance from the Teatro Ambra Jovinelli [km]  | 0.79 | 0.45 |  | 1001m-1500m                     | 105 |
|                                                |      |      |  | 1501m-2000m                     | 94  |
|                                                |      |      |  | 2001m-2500m                     | 41  |
|                                                |      |      |  | 2501m-3100m                     | 52  |
|                                                |      |      |  | 0-500m                          | 19  |
|                                                |      |      |  | 0-500m                          | 19  |

| Distance from the Basilica of Santa Croce in Gerusalemme [km] |  |  | 501m-1000m  | 78  |
|---------------------------------------------------------------|--|--|-------------|-----|
|                                                               |  |  | 1001m-1500m | 114 |
|                                                               |  |  | 1501m-2000m | 92  |
|                                                               |  |  | 2001m-2500m | 59  |
|                                                               |  |  | 2501m-2900m | 38  |
| Distance from the Basilica of Santa Maria Maggiore [km]       |  |  | 0-500m      | 91  |
|                                                               |  |  | 501m-1000m  | 180 |
|                                                               |  |  | 1001m-1500m | 112 |
|                                                               |  |  | 1501m-2000m | 17  |
| Distance from the Secret Service Office [km]                  |  |  | 0-500m      | 121 |
|                                                               |  |  | 501m-1000m  | 159 |
|                                                               |  |  | 1001m-1500m | 31  |
|                                                               |  |  | 1501m-2000m | 67  |
|                                                               |  |  | 2001m-2400m | 22  |
| Distance from the Polygraph and Mint Institute [km]           |  |  | 0-500m      | 127 |
|                                                               |  |  | 501m-1000m  | 159 |
|                                                               |  |  | 1001m-1500m | 68  |
|                                                               |  |  | 1501m-2000m | 46  |
| Distance from the Ministry of Defence [km]                    |  |  | 0-500m      | 22  |
|                                                               |  |  | 501m-1000m  | 47  |
|                                                               |  |  | 1001m-1500m | 152 |
|                                                               |  |  | 1501m-2000m | 124 |
|                                                               |  |  | 2001m-2500m | 41  |
|                                                               |  |  | 2500m-3000m | 14  |
| Distance from the Ministry of the Interior [km]               |  |  | 0-500m      | 34  |
|                                                               |  |  | 501m-1000m  | 134 |
|                                                               |  |  | 1001m-1500m | 136 |
|                                                               |  |  | 1501m-2000m | 88  |
|                                                               |  |  | 2001m-2200m | 8   |
| Distance from the Revenue Agency Office [km]                  |  |  | 0-500m      | 41  |
|                                                               |  |  | 501m-1000m  | 77  |
|                                                               |  |  | 1001m-1500m | 101 |
|                                                               |  |  | 1501m-2000m | 90  |
|                                                               |  |  | 2001m-2500m | 65  |
|                                                               |  |  | 2501m-3100m | 26  |
| Distance from the Finance Ministry [km]                       |  |  | 0-500m      | 84  |
|                                                               |  |  | 501m-1000m  | 190 |
|                                                               |  |  | 1001m-1500m | 68  |
|                                                               |  |  | 1501m-2000m | 57  |
|                                                               |  |  | 2001m-2100m | 1   |
| Distance from the Manzoni                                     |  |  | 0-500m      | 93  |

| metro station [km]                     |      |  | 501m-1000m  | 158   |
|----------------------------------------|------|--|-------------|-------|
|                                        |      |  | 1001m-1500m | 53    |
|                                        |      |  | 1501m-2000m | 53    |
|                                        |      |  | 2001m-2500m | 43    |
|                                        |      |  | 0-500m      | 198   |
| Distance from the Vittorio Emanuele    |      |  | 501m-1000m  | 95    |
| metro station [km]                     |      |  | 1001m-1500m | 79    |
| 0.69                                   | 0.47 |  | 1501m-2000m | 27    |
|                                        |      |  | 2001m-2600m | 1     |
|                                        |      |  | 0-500m      | 36    |
| Distance from the Repubblica           |      |  | 501m-1000m  | 154   |
| metro station [km]                     |      |  | 1001m-1500m | 126   |
| 1.18                                   | 0.50 |  | 1501m-2000m | 65    |
|                                        |      |  | 2001m-2500m | 19    |
|                                        |      |  | 0-500m      | 42    |
| Distance from the Castro Pretorio      |      |  | 501m-1000m  | 35    |
| metro station [km]                     |      |  | 1001m-1500m | 146   |
| 1.44                                   | 0.55 |  | 1501m-2000m | 117   |
|                                        |      |  | 2001m-2500m | 60    |
| Number of buildings whose facades are  |      |  | 0-100m      | 2653  |
| characterized by an excellent state of |      |  | 101m-300m   | 12946 |
| conservation [n.]                      |      |  | 301m-500m   | 17088 |
| Number of buildings whose facades are  |      |  | 0-100m      | 5625  |
| characterized by a good state of       |      |  | 101m-300m   | 28212 |
| conservation [n.]                      |      |  | 301m-500m   | 37247 |
| Number of buildings whose facades are  |      |  | 0-100m      | 1203  |
| characterized by a bad state of        |      |  | 101m-300m   | 5302  |
| conservation [n.]                      |      |  | 301m-500m   | 5381  |

**Table S1.** Descriptive statistics of the variables considered in the analysis

## Methodology

The Evolutionary Polynomial Regression (EPR) econometric technique uses multi-objective genetic algorithms to identify the model that, at the same time, maximizes the data accuracy and the parsimony of the mathematical expressions. The methodology performs a multivariable analysis, i.e. considers a set of factors (intrinsic and extrinsic) that are ordinarily influential on the selling prices, and selects those that - for the properties collected in the study sample - have the most significant impacts. Starting from the different intrinsic and extrinsic variables that mainly characterize the bargaining phases, the EPR technique allows to firstly identify those most influencing in the property prices formation processes and, then, to verify the functional correlation between each independent variable and the dependent one (the selling prices).

A set of polynomial functions, named models, are generated and each term included in the expression consists of a numerical parameter and an input variable or a combination of variables, possibly raised through opportune numerical exponents.

According to the range of candidate real numbers among which the technique selects the exponents and to the maximum terms number, both preliminarily fixed by the user, the generated models are characterized by a different mathematical complexity level.

The generic symbolic expression returned by EPR application is shown in Eq.(S1)

$$Y = \sum_{i=1}^l [a_i \cdot (X_n)^{(i,n)} \cdot \dots \cdot (X_j)^{(i,j)} \cdot f((X_n)^{(i,j+n)} \cdot \dots \cdot (X_j)^{(i,2j)})] + a_0 \quad (S1)$$

With  $l$  that is the number of model additive terms,  $a_i$  are numerical parameters,  $X_i$  are candidate input variables among those initially considered in the analysis,  $(i, n)$  - with  $n = (1, \dots, 2j)$  - is the exponent of the  $n$ -th explanatory variable within the  $i$ -th term preliminarily chosen by the user,  $a_0$  is the equation constant term,  $f$  is a function selected by the user between a set of different mathematical expressions (the *no function* option is included).

The EPR technique allows to simultaneously pursue different objective functions, by defining an optimal Pareto frontier of the conflictual objectives, with the aim of maximizing the model statistical accuracy, of maximizing the model parsimony, through the minimization of the number of coefficients ( $a_i$ ) of the equation, of decreasing the complexity of each model, through the minimization of the number of explanatory variables ( $X_i$ ) of the final equation.

The Coefficient of Determination (COD) is determined for each equation in order to help the valuer choice related to the best model. This indicator is calculated as shown in Eq. (S2) and it varies from the value 0 (minimum statistical accuracy) to the value 100% (maximum statistical accuracy). In particular, the fitting of each model is higher when the COD is close to 100%, by confirming the model structure suitability to represent the overall observed dataset.

$$CoD = 1 - \frac{N-1}{N} \cdot \frac{\sum_N (y_e - y_d)^2}{\sum_N (y_d - \text{mean}(y_d))^2} \quad (S2)$$

where  $y_e$  are the values of the dependent variable assessed by the EPR methodology,  $y_d$  are the collected values of the dependent variable,  $N$  is the sample size.

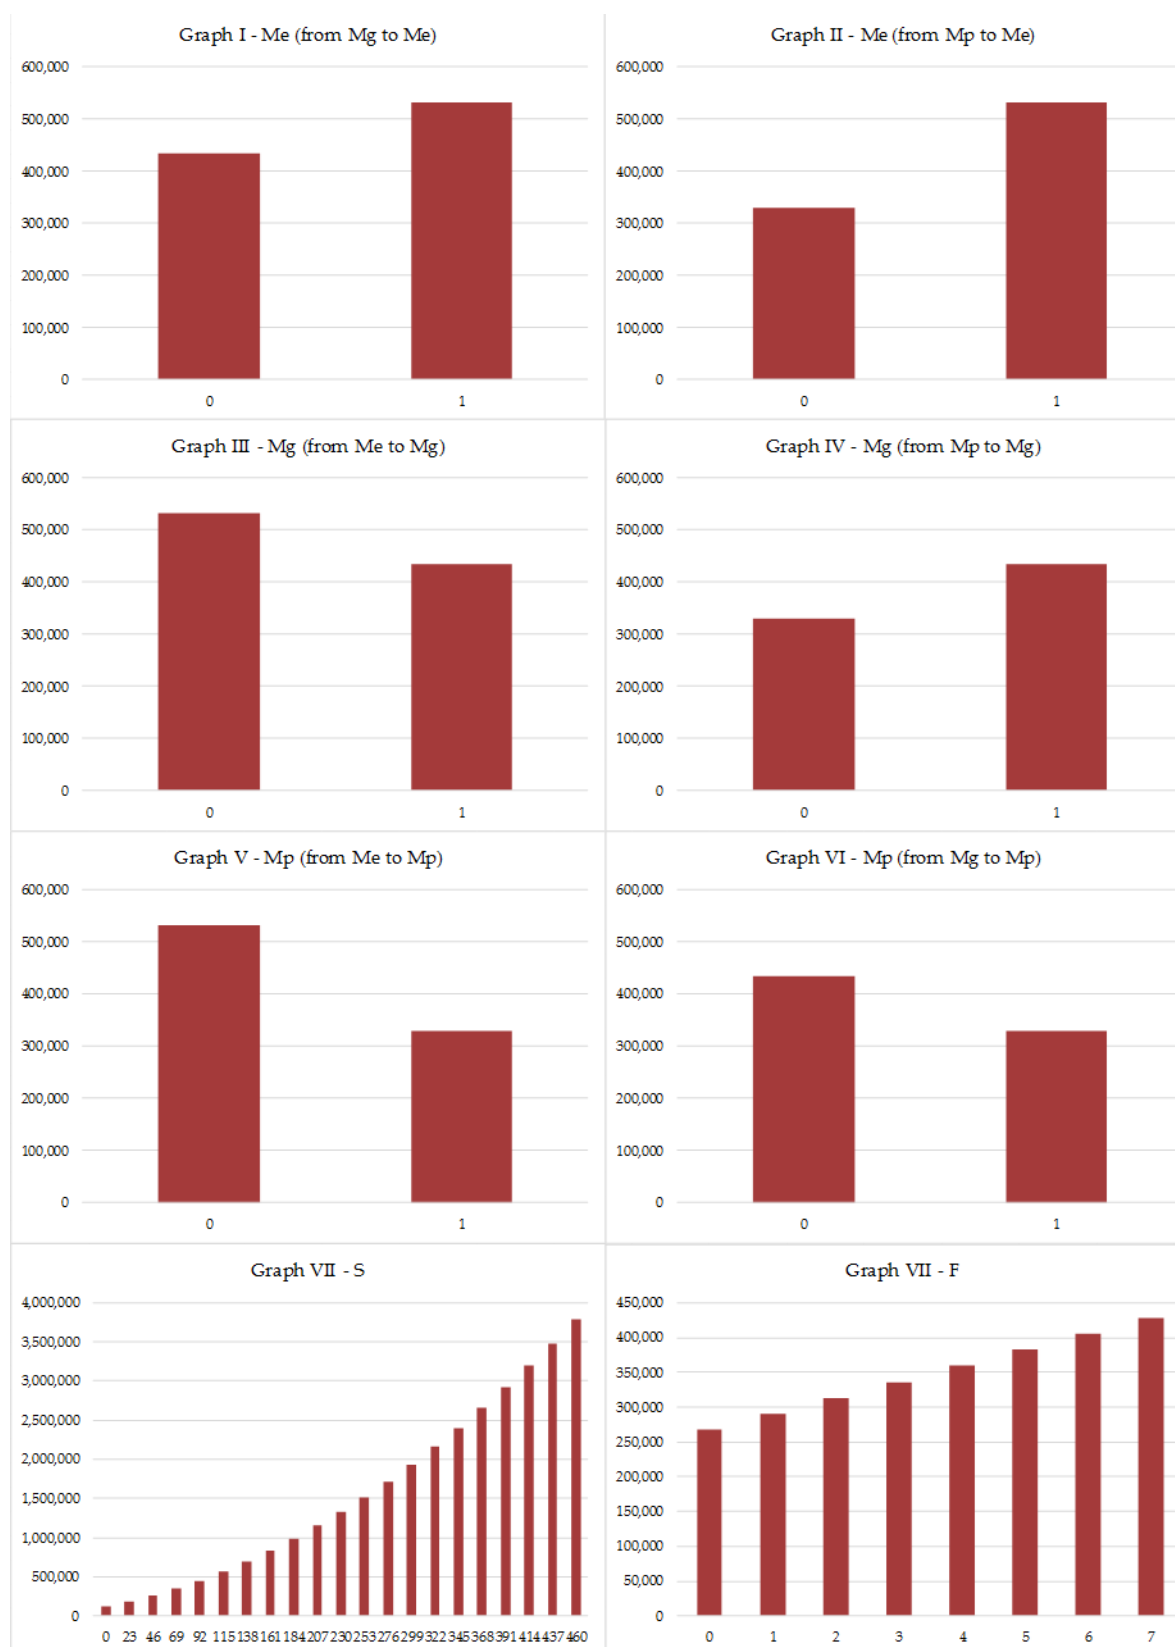

**Figure S1.** Functional relationships between the total selling prices and the intrinsic factors selected by the EPR model



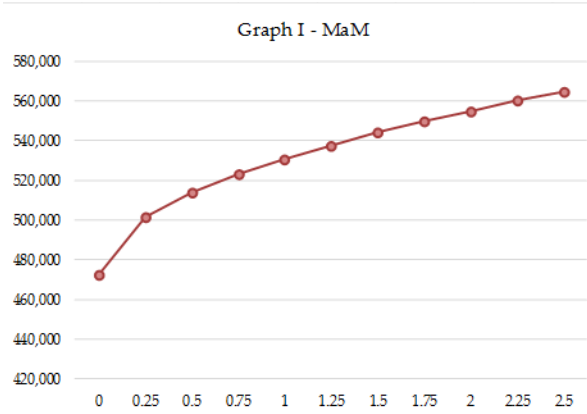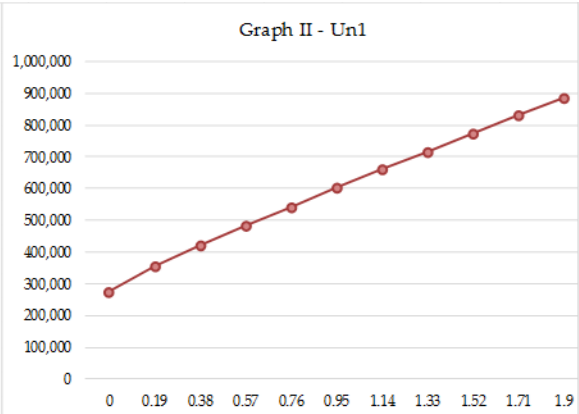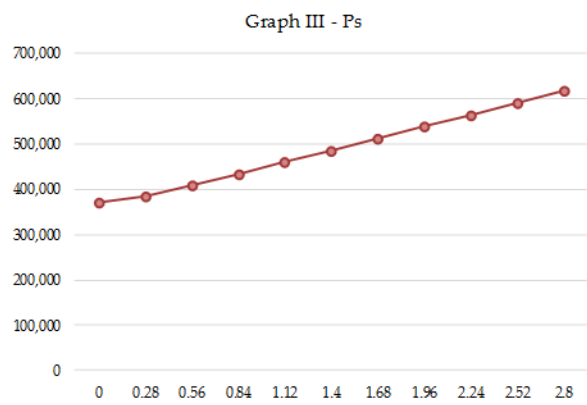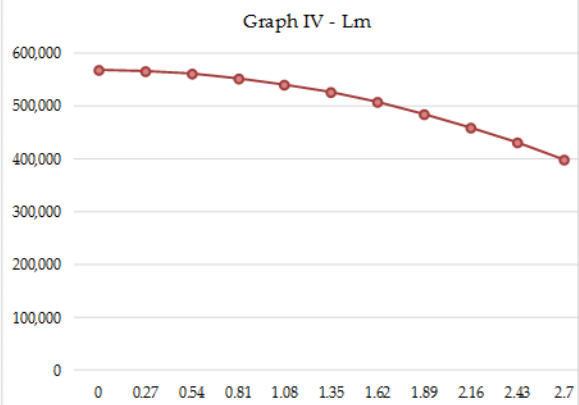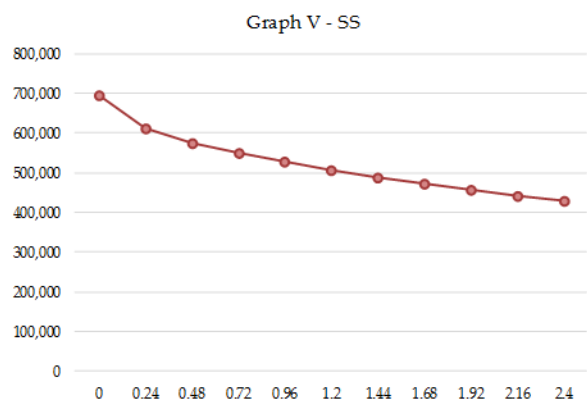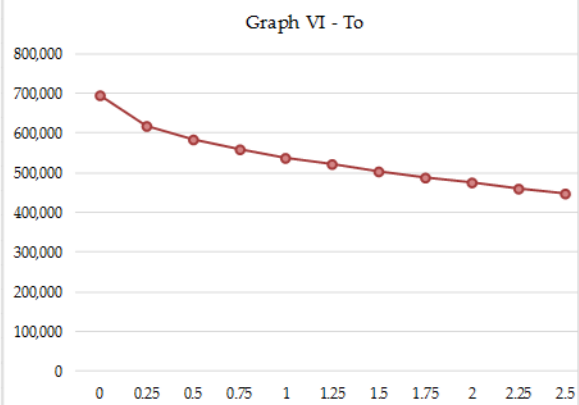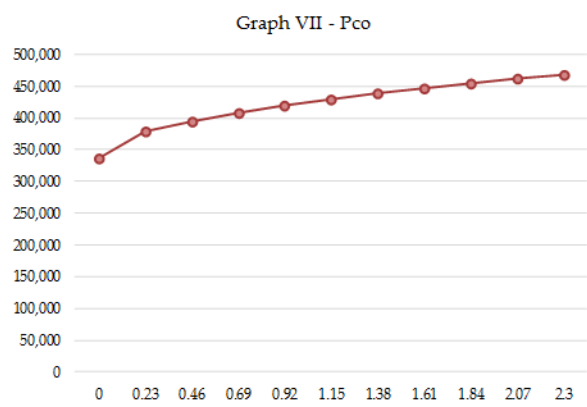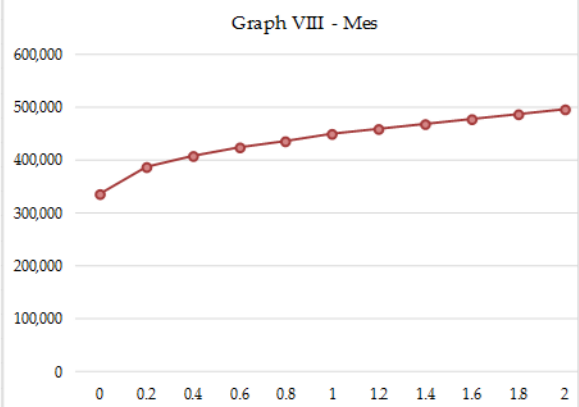

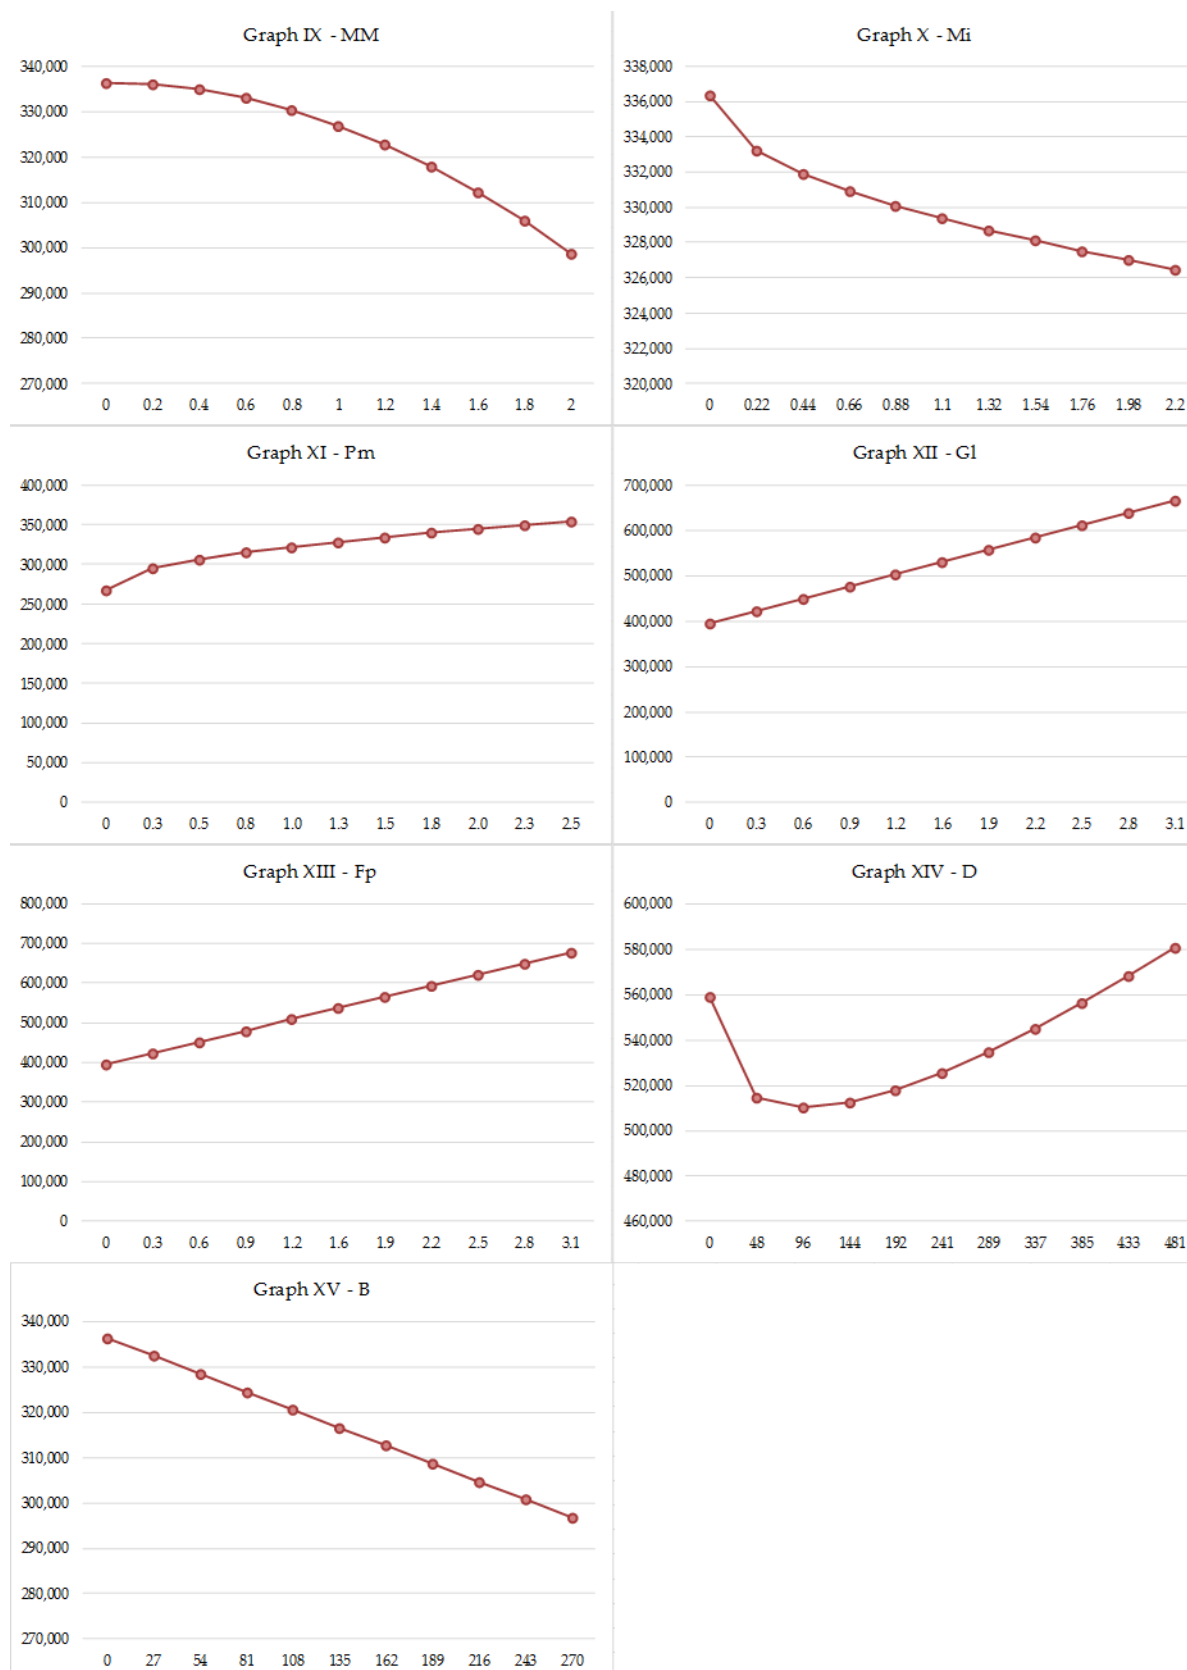

**Figure S2.** Functional relationships between the total selling prices and the extrinsic factors selected by the EPR model
